# Supplementary material for: TNF-α and IFN-γ Together Up-Regulates Par-4 Expression and Induce Apoptosis in Human Neuroblastomas
Source: Biomedicines. 2017 Dec 26;6(1):4. doi: 10.3390/biomedicines6010004 (PMC5874661; doi:10.3390/biomedicines6010004)
Supplement: Supplementary file 1 [file biomedicines-06-00004-s001.pdf]

# Supplementary Materials: TNF- $\alpha$ and IFN- $\gamma$ together up-regulates Par-4 expression and induce apoptosis in human neuroblastomas

Ganesh V. Shelke, Jayashree C. Jagtap, Dae-Kyum Kim, Reecha D. Shah, Gowry Das, Mruthyunjaya Shivayogi, Radha Pujari and Padma Shastry

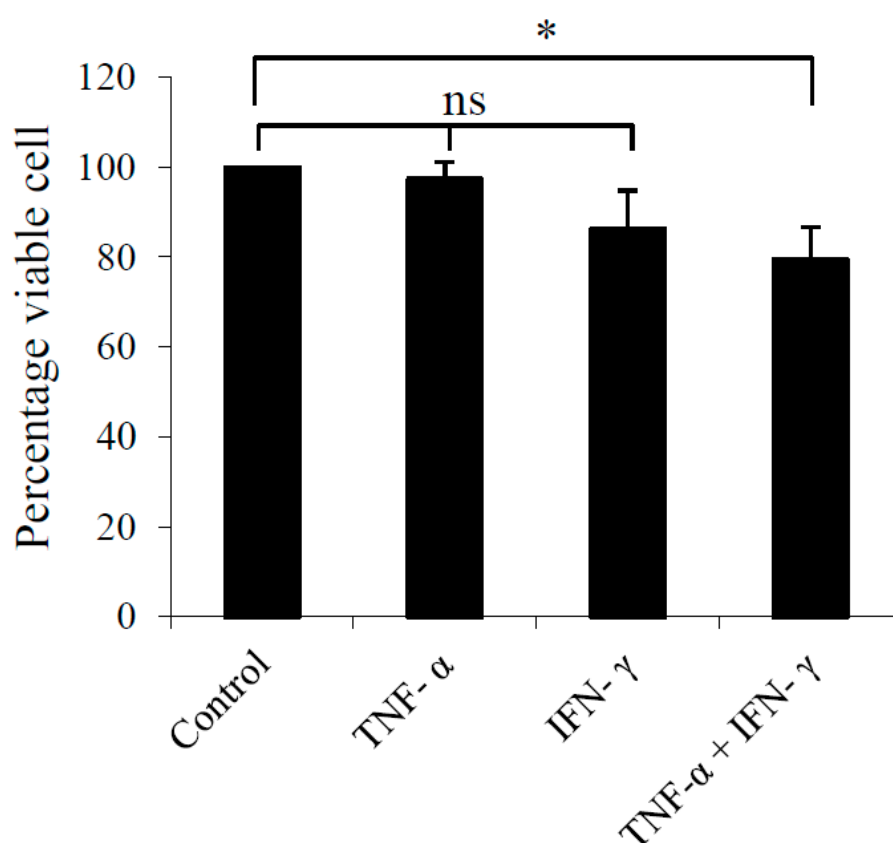

**Figure S1.** Viability of SH-SY-5Y cells after long exposure of Interferon-gamma (IFN- $\gamma$ ) and Tumor necrosis factor-alpha (TNF- $\alpha$ ) alone and in combination treatment. Cells were treated with TNF- $\alpha$  (20 ng/ml) and IFN- $\gamma$  (10 ng/ml) alone and in combination for 96 h and the viable cells were quantified by 3-(4,5-dimethylthiazol-2-yl)-2,5-diphenyltetrazolium bromide (MTT) assay. Data represent mean  $\pm$  SD ( $n = 3$ ). \*  $p < 0.05$ ; ns: no significant difference.

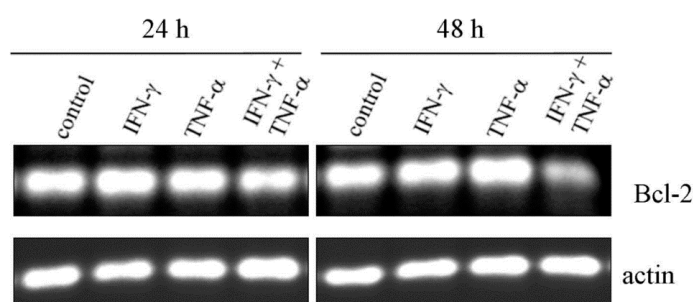

**Figure S2.** Analysis of B-cell lymphoma-2 (Bcl-2) transcript using RT-PCR at 24 and 48 h time on exposure of IFN- $\gamma$  and TNF- $\alpha$  alone and in combination.
